# Supplementary material for: Deciphering the influence of Pd II and Pd IV oxidation states on non-standard chemical bonds within bis(jN-heterocyclic carbene) complexes: insights from DFT
Source: Royal Society of Chemistry journal article supplement (doi:10.1039/d4ra03893b), 2024-01-01
Supplement: d4ra03893b1.pdf [file d4ra03893b1.pdf]

## Supplementary Information

### Deciphering the Influence of Pd<sup>II</sup> and Pd<sup>IV</sup> Oxidation State on Non-Standard Chemical Bonds within Bis(*j*N-Heterocyclic Carbene) Complexes: Insights from DFT

Jean Ongagna Moto<sup>a\*</sup>, Abel Idrice Adjieufack<sup>b\*</sup>, Simon Ngom Ndicka<sup>a</sup>, Gaël Mouzong D'ambassa<sup>a</sup>, Suzane Leonie Mazia Djendo<sup>a</sup> and Désiré Mama Bikele<sup>a</sup>

<sup>a</sup>Computational and Theoretical Chemistry Unit, Department of Chemistry, Faculty of Science, University of Douala, P.O. Box 24157, Douala, Cameroon;

<sup>b</sup>Physical and Theoretical Chemistry Laboratory, University of Yaoundé I  
P.O. Box 812 Yaoundé, Cameroon.

E-mail: [jean.monfils@yahoo.fr](mailto:jean.monfils@yahoo.fr)  
[adjieufack21@gmail.com](mailto:adjieufack21@gmail.com)

#### Table of content

|                                                                                                                                                                                                                                                                                                     |   |
|-----------------------------------------------------------------------------------------------------------------------------------------------------------------------------------------------------------------------------------------------------------------------------------------------------|---|
| Table 1S. NBO atomic charges (Q/e) of the C <sub>j</sub> NHC carbon atom and Pd <sup>i+</sup> ion in isolated moieties[bis( <i>j</i> NHC) and PdX <sub>i</sub> ] and in each complex[1a, 2a, 1n, 2a, 3a, 4a, 3n and 4n].....                                                                        | 2 |
| Table 2S. Palladium Natural Electron Configuration in different complexes.....                                                                                                                                                                                                                      | 2 |
| Table 3S. Natural Hybrid Orbital (NHO) Analysis of Pd-X bond in different complexes.....                                                                                                                                                                                                            | 3 |
| Figure 1S. Total (black), partial [red (C <sub>j</sub> NHC), blue (Pd <sup>4+</sup> ), and magenta (Cl ∨ Br), and overlap [green, between C <sub>j</sub> NHC and Pd <sup>4+</sup> and X(X = Cl ∨ Br) basis functions] density-of-states map of La[Ln]Pd <sup>IV</sup> X <sub>4</sub> complexes..... | 4 |
| Figure 2S. Natural Population Analysis (NPA) charges on the C <sub>j</sub> NHC atom (bis( <i>j</i> NHC)) and Pd <sup>i+</sup> (PdX <sub>i</sub> ) isolated moieties and their difference in 1-4a(n) complexes.....                                                                                  | 4 |
| Figure 3S. The second-order perturbation energy stabilization (E <sup>2</sup> ) for each donor NBO (i) and acceptor NBO(j) from the lone pair Pd to C <sub>n</sub> NHC...N or C <sub>a</sub> NHC...N bond in all complexes.....                                                                     | 5 |
| Figure 4S. Local region basin analysis on C <sub>j</sub> NHC-Pd and Pd-X in only 3a and 4n bis(aNHC)[bis(nNHC)]Pd <sup>IV</sup> X <sub>4</sub> complexes.....                                                                                                                                       | 5 |

**Table 1S.** NBO atomic charges (Q/e) of the C<sub>j</sub>NHC carbon atom and Pd<sup>i+</sup> ion in isolated moieties[bis(jNHC) and PdXi] and in each complex[1a, 2a, 1n, 2a, 3a, 4a, 3n and 4n].

| Complexes |           | in Complex       |                   | in PdXi          |                  | in Bis(jNHC)      |                   |
|-----------|-----------|------------------|-------------------|------------------|------------------|-------------------|-------------------|
|           |           | Pd <sup>i+</sup> | C <sub>jNHC</sub> | Pd <sup>2+</sup> | Pd <sup>4+</sup> | C <sub>nNHC</sub> | C <sub>aNHC</sub> |
| X = Cl    | <b>1n</b> | -0.01            | 0.32              | 0.53             | -                | 0.14              | -                 |
|           | <b>1a</b> | 0.04             | 0.02              |                  |                  |                   |                   |
| X = Br    | <b>2n</b> | -0.18            | 0.32              | 0.44             | -                |                   |                   |
|           | <b>2a</b> | -0.16            | 0.02              |                  |                  |                   |                   |
| X = Cl    | <b>3n</b> | -0.08            | 0.39              | -                | 0.44             | -                 | -0.18             |
|           | <b>3a</b> | -0.02            | 0.10              |                  |                  |                   |                   |
| X = Br    | <b>4n</b> | -0.33            | 0.38              | -                | 0.18             |                   |                   |
|           | <b>4a</b> | -0.27            | 0.09              |                  |                  |                   |                   |

**Table 2S.** Palladium Natural Electron Configuration in different complexes.

| Species | Natural Electron Configuration                 | Isolated state |
|---------|------------------------------------------------|----------------|
| 1n      | [core]5S(0.41)4d(9.02)5p(0.29)5d(0.01)6p(0.21) | [core]4d(8.00) |
| 1a      | [core]5S(0.40)4d(9.01)5p(0.28)5d(0.01)6p(0.19) |                |
| 2n      | [core]5S(0.42)4d(9.07)5p(0.31)5d(0.01)6p(0.23) |                |
| 2a      | [core]5S(0.41)4d(9.06)5p(0.29)5d(0.01)6p(0.21) |                |
| 3n      | [core]5S(0.38)4d(8.73)5p(0.32)5d(0.01)6p(0.64) |                |
| 3a      | [core]5S(0.36)4d(8.71)5p(0.32)5d(0.01)6p(0.62) |                |
| 4n      | [core]5S(0.42)4d(8.85)5p(0.70)5d(0.01)6p(0.36) |                |
| 4a      | [core]5S(0.40)4d(8.83)5p(0.68)5d(0.01)6p(0.35) |                |

**Table 3S.** Natural Hybrid Orbital (NHO) Analysis of Pd-X bond in different complexes.

| Comp | Occu. | Polarizability |                                        | Hybridation                    |                                      |
|------|-------|----------------|----------------------------------------|--------------------------------|--------------------------------------|
|      |       | Pd             | X/X'X <sup>eq</sup> /X <sup>eq</sup> ' | Pd                             | X/X <sup>eq</sup> /X <sup>eq</sup> ' |
| 1n   | 1.90  | 18.34%         | 81.66%                                 | s(23.44%),p(52.83%),d( 23.73%) | s(15.35%),p(84.65%)                  |
|      | 1.90  | 18.34%         | 81.66%                                 | s(23.44%),p(52.83%),d( 23.73%) | s(15.35%),p(84.65%)                  |
|      | -     | -              | -                                      | -                              | -                                    |
|      | -     | -              | -                                      | -                              | -                                    |
| 2n   | 1.89  | 21.04%         | 78.96%                                 | s(23.23%),p(53.33%),d( 23.44%) | s(14.26%),p( 85.74%)                 |
|      | 1.89  | 21.04%         | 78.96%                                 | s(23.23%),p(53.33%),d( 23.44%) | s(14.26%),p( 85.74%)                 |
|      | -     | -              | -                                      | -                              | -                                    |
|      | -     | -              | -                                      | -                              | -                                    |
| 3n   | 1.86  | 27.13%         | 72.87%                                 | s(15.19%),p(52.71%),d(32.10%)  | s(10.71%),p(89.29%)                  |
|      | 1.86  | 27.13%         | 72.87%                                 | s(15.19%),p(52.71%),d(32.10%)  | s(10.71%),p(89.29%)                  |
|      | 1.83  | 29.12%         | 70.88%                                 | s(16.23%),p(49.61%),d(34.16%)  | s(9.00%),p(91.00%)                   |
|      | 1.83  | 28.46%         | 71.54%                                 | s(15.89%),p(50.24%),d(33.88%)  | s(9.40%),p(90.60%)                   |
| 4n   | 1.84  | 31.82%         | 68.18%                                 | s(14.40%),p(53.15%),d(32.45%)  | s(9.28%),p(90.72%)                   |
|      | 1.84  | 31.82%         | 68.18%                                 | s(14.40%),p(53.15%),d(32.45%)  | s(9.28%),p(90.72%)                   |
|      | 1.81  | 32.99%         | 67.01%                                 | s(16.84%),p(49.79%),d(33.36%)  | s(7.98%),p(92.02%)                   |
|      | 1.81  | 31.94%         | 68.06%                                 | s(16.79%),p(50.19%),d(33.03%)  | s(8.34%),p(91.66%)                   |
| 1a   | 1.91  | 17.26%         | 82.74%                                 | s(23.41%),p(53.70%),d(22.89%)  | s(16.25%),p(83.75%)                  |
|      | 1.91  | 17.26%         | 82.74%                                 | s(23.41%),p(53.70%),d(22.89%)  | s(16.25%),p(83.75%)                  |
|      | -     | -              | -                                      | -                              | -                                    |
|      | -     | -              | -                                      | -                              | -                                    |
| 2a   | 1.90  | 19.61%         | 80.39%                                 | s(23.22%),p( 54.12%),d(22.67%) | s(15.15%),p( 84.85%)                 |
|      | 1.90  | 19.61%         | 80.39%                                 | s(23.22%),p( 54.12%),d(22.67%) | s(15.15%),p( 84.85%)                 |
|      | -     | -              | -                                      | -                              | -                                    |
|      | -     | -              | -                                      | -                              | -                                    |
| 3a   | 1.87  | 24.93%         | 75.07%                                 | s(15.46%),p(54.22%),d(30.32%)  | s(12.19%),p(87.81%)                  |
|      | 1.87  | 24.93%         | 75.07%                                 | s(15.46%),p(54.22%),d(30.32%)  | s(12.19%),p(87.81%)                  |
|      | 1.84  | 26.73%         | 73.27%                                 | s(15.99%),p(50.66%),d( 33.36%) | s(10.02%),p(89.98%)                  |
|      | 1.82  | 29.18%         | 70.82%                                 | s(16.09%),p(49.10%),d(34.81%)  | s(9.08%),p(90.92%)                   |
| 4a   | 1.86  | 29.14%         | 70.86%                                 | s(14.81%),p(54.64%),d( 30.55%) | s(10.80%),p(89.20%)                  |
|      | 1.86  | 29.14%         | 70.86%                                 | s(14.81%),p(54.64%),d( 30.55%) | s(10.80%),p(89.20%)                  |
|      | 1.82  | 30.38%         | 69.62%                                 | s(16.86%),p(50.55%),d(32.58%)  | s(8.97%),p(91.03%)                   |
|      | 1.80  | 32.76%         | 67.24%                                 | s(16.91%),p(49.27%),d(33.83%)  | s(8.21%),p(91.79%)                   |

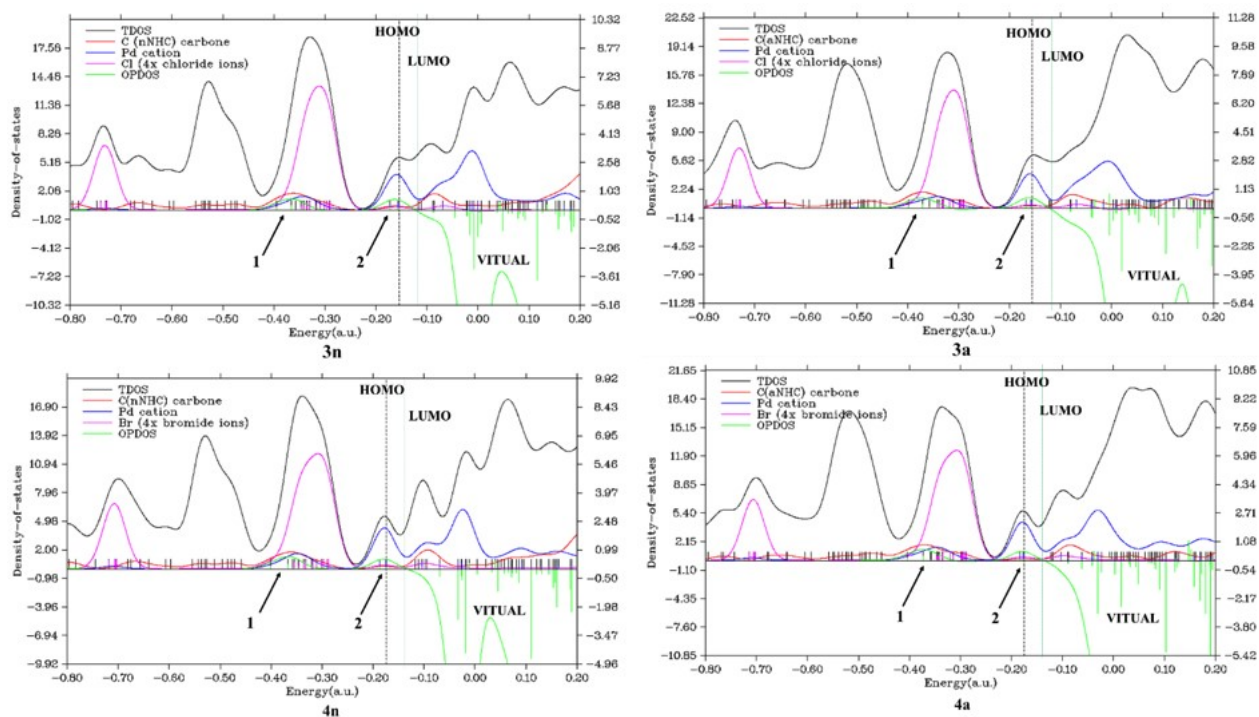

**Figure 1S.** Total (black), partial [red ( $C_{jNHC}$ ), blue ( $Pd^{4+}$ ), and magenta ( $Cl \vee Br$ ), and overlap [green, between  $C_{jNHC}$  and  $Pd^{4+}$  and  $X(X = Cl \vee Br)$  basis functions] density-of-states map of  $La[Ln]Pd^{IV}X_4$  complexes.

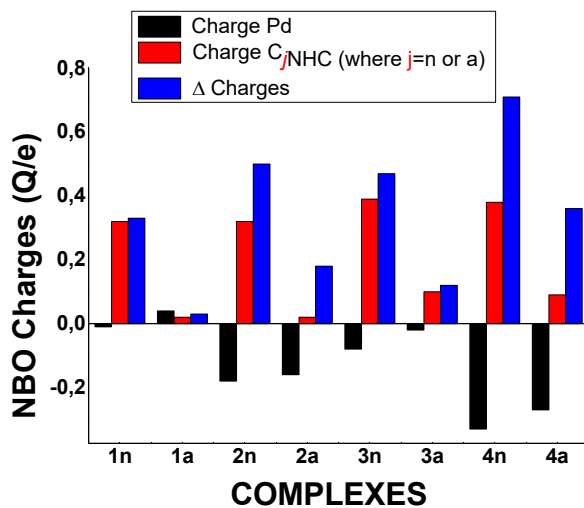

**Figure 2S.** Natural Population Analysis (NPA) charges on the  $C_{jNHC}$  atom (bis( $jNHC$ )) and  $Pd^{4+}$  ( $PdXi$ ) isolated moieties and their difference in 1-4a(n) complexes.

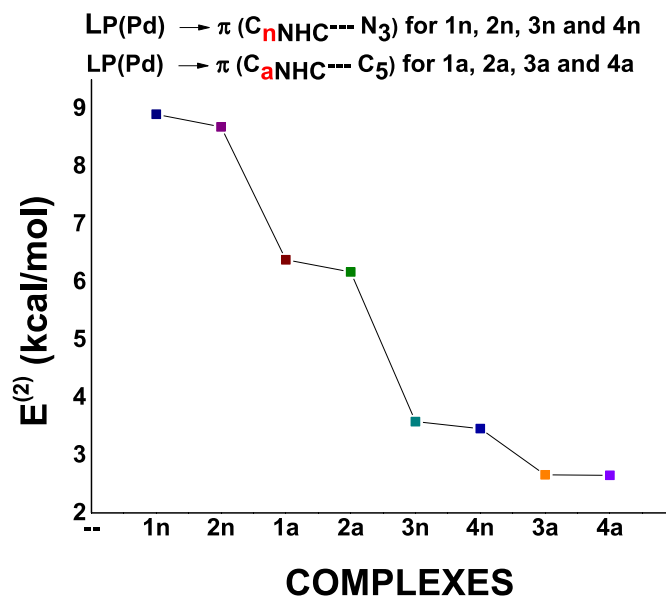

**Figure 3S.** The second-order perturbation energy stabilization ( $E^{(2)}$ ) for each donor NBO (i) and acceptor NBO(j) from the lone pair Pd to  $C_{nNHC} \cdots N$  or  $C_{aNHC} \cdots N$  bond in all complexes.

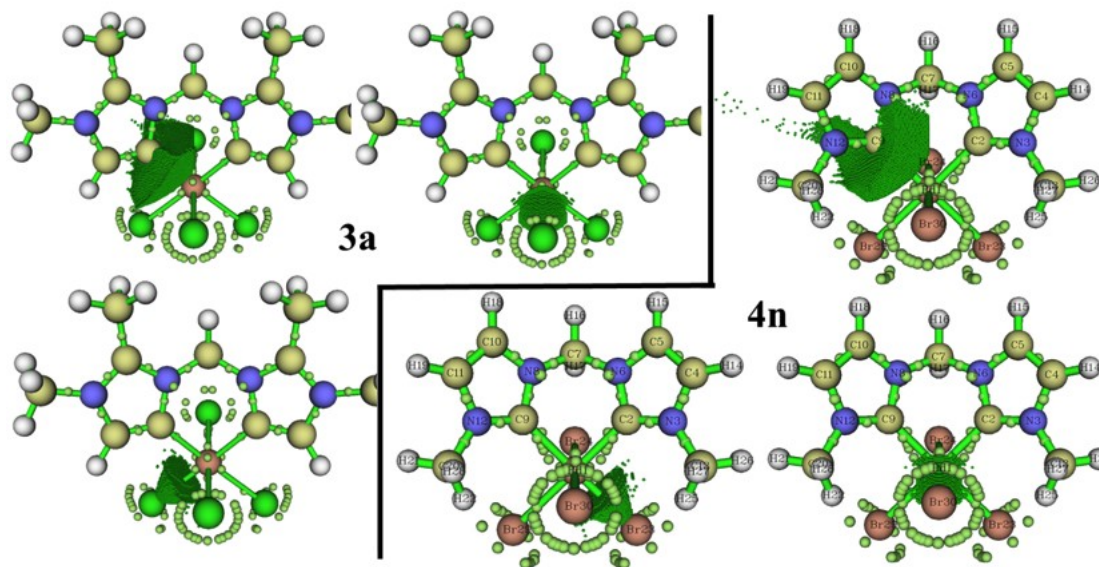

**Figure 4S.** Local region basin analysis on  $C_{jNHC}$ -Pd and Pd-X in only **3a** and **4n** bis(aNHC)[bis(nNHC)]Pd<sup>IV</sup>X<sub>4</sub> complexes.
